# Supplementary material
Source: Springer Nature journal article supplement (https://www.springermedizin.de/resource/supplementary/12880_2009_78_MOESM2_ESM.pdf/9449960)
Supplement: MOESM2 [file 9449960]

Number of viewing panels

Viewing preferences

Quantification

Play

Load

Adjust view

Report tools

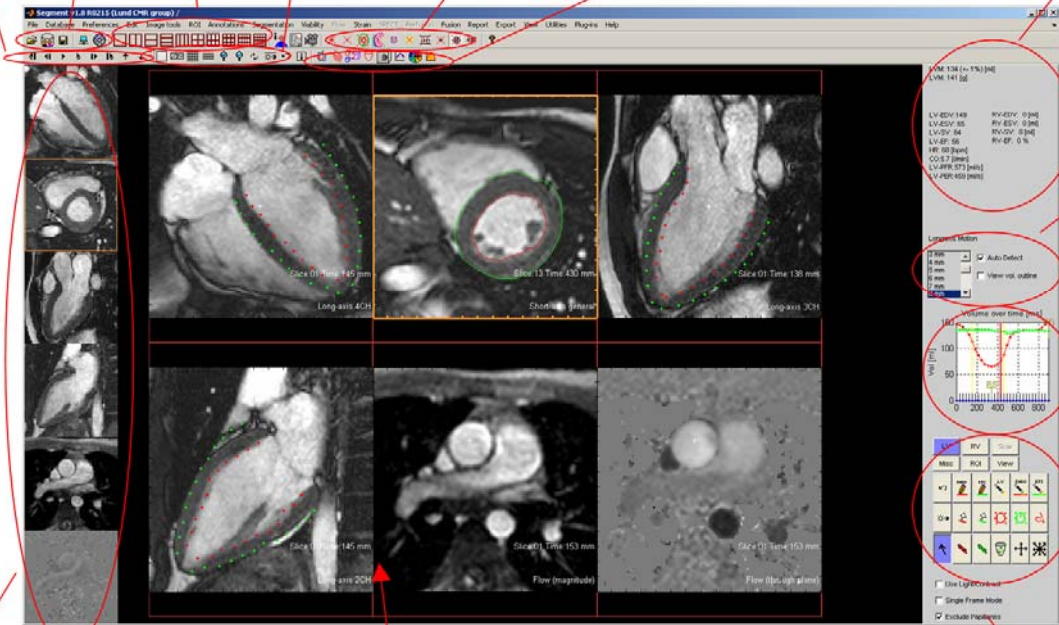

Long-axis motion

Volume curve

Toolbar Palette

Segmentation preferences

Thumbnail preview

Main viewing area
